# Supplementary material for: The Dysferlin Domain-Only Protein, Spo73, Is Required for Prospore Membrane Extension in Saccharomyces cerevisiae
Source: PubMed Central journal article supplement (PMC4863634; doi:10.1128/msphere.00038-15), 2015-12-16
Supplement: sph001160039st1.pdf [file sph001160039st1.pdf]

Table S1. Genes screened in this study

| gene name    | systematic name |              |         |               |           |               |         |
|--------------|-----------------|--------------|---------|---------------|-----------|---------------|---------|
| <i>ACSI</i>  | YAL054C         | <i>CDC40</i> | YDR364C | <i>GCN5</i>   | YGR252W   | <i>MND2</i>   | YIR025W |
| <i>ADA2</i>  | YDR448W         | <i>CKB1</i>  | YGL019W | <i>GCSI</i>   | YDL226C   | <i>MRK1</i>   | YDL079C |
| <i>ADH7</i>  | YCR105W         | <i>CLB5</i>  | YPR120C | <i>GEA1</i>   | YJR031C   | <i>MTC6</i>   | YHR151C |
| <i>AGE2</i>  | YIL044C         | <i>CLU1</i>  | YMR012W | <i>GEP5</i>   | YLR091W   | <i>MUM2</i>   | YBR057C |
| <i>AIM36</i> | YMR157C         | <i>COA1</i>  | YIL157C | <i>GET1</i>   | YGL020C   | <i>MUM3</i>   | YOR298W |
| <i>AKR1</i>  | YDR264C         | <i>CRS5</i>  | YOR031W | <i>GIM5</i>   | YML094W   | <i>MUS81</i>  | YDR386W |
| <i>AMA1</i>  | YGR225W         | <i>CSF1</i>  | YLR087C | <i>GON7</i>   | YJL184W   | <i>NAT1</i>   | YDL040C |
| <i>APL3</i>  | YBL037W         | <i>CST9</i>  | YLR394W | <i>GPB2</i>   | YAL056W   | <i>NBP2</i>   | YDR162C |
| <i>APS3</i>  | YJL024C         | <i>CTK1</i>  | YKL139W | <i>GRX3</i>   | YDR098C   | <i>NEM1</i>   | YHR004C |
| <i>APT1</i>  | YML022W         | <i>CTK3</i>  | YML112W | <i>GSP2</i>   | YOR185C   | <i>NGG1</i>   | YDR176W |
| <i>ARC1</i>  | YGL105W         | <i>CTS2</i>  | YDR371W | <i>HMG2</i>   | YLR450W   | <i>NMD2</i>   | YHR077C |
| <i>ARC18</i> | YLR370C         | <i>CYC8</i>  | YBR112C | <i>HMT1</i>   | YBR034C   | <i>NPR3</i>   | YHL023C |
| <i>ARD1</i>  | YHR013C         | <i>DEF1</i>  | YKL054C | <i>HOP2</i>   | YGL033W   | <i>NUP120</i> | YKL057C |
| <i>ARG82</i> | YDR173C         | <i>DEP1</i>  | YAL013W | <i>HPR1</i>   | YDR138W   | <i>NUP170</i> | YBL079W |
| <i>ARO2</i>  | YGL148W         | <i>DHH1</i>  | YDL160C | <i>HSL7</i>   | YBR133C   | <i>NUP84</i>  | YDL116W |
| <i>ASE1</i>  | YOR058C         | <i>DIA2</i>  | YOR080W | <i>HTD2</i>   | YHR067W   | <i>NUR1</i>   | YDL089W |
| <i>ATG1</i>  | YGL180W         | <i>DID4</i>  | YKL002W | <i>ICT1</i>   | YLR099C   | <i>PAU8</i>   | YAL068C |
| <i>ATG1</i>  | YPR049C         | <i>DMC1</i>  | YER179W | <i>IDS2</i>   | YJL146W   | <i>PBP1</i>   | YGR178C |
| <i>ATG10</i> | YLL042C         | <i>DOA1</i>  | YKL213C | <i>IFA38</i>  | YBR159W   | <i>PCK1</i>   | YKR097W |
| <i>ATG12</i> | YBR217W         | <i>DRS2</i>  | YAL026C | <i>IGO2</i>   | YHR132W-A | <i>PEX12</i>  | YMR026C |
| <i>ATG13</i> | YPR185W         | <i>EAF1</i>  | YDR359C | <i>IMP2'</i>  | YIL154C   | <i>PEX25</i>  | YPL112C |
| <i>ATG15</i> | YCR068W         | <i>EAF6</i>  | YJR082C | <i>IRA2</i>   | YOL081W   | <i>PEX31</i>  | YGR004W |
| <i>ATG16</i> | YMR159C         | <i>ECM8</i>  | YBR076W | <i>ISC1</i>   | YER019W   | <i>PFK2</i>   | YMR205C |
| <i>ATG18</i> | YFR021W         | <i>EMI1</i>  | YDR512C | <i>ISC10</i>  | YER180C   | <i>PFK26</i>  | YIL107C |
| <i>ATG2</i>  | YNL242W         | <i>EMI2</i>  | YDR516C | <i>KAP120</i> | YPL125W   | <i>PGD1</i>   | YGL025C |
| <i>ATG29</i> | YPL166W         | <i>EMP70</i> | YLR083C | <i>KCSI</i>   | YDR017C   | <i>PKH2</i>   | YOL100W |
| <i>ATG3</i>  | YNR007C         | <i>ENT4</i>  | YLL038C | <i>LAS21</i>  | YJL062W   | <i>PLB1</i>   | YMR008C |
| <i>ATG31</i> | YDR022C         | <i>EPS1</i>  | YIL005W | <i>LEO1</i>   | YOR123C   | <i>PLB2</i>   | YMR006C |
| <i>ATG5</i>  | YPL149W         | <i>ERG4</i>  | YGL012W | <i>LGE1</i>   | YPL055C   | <i>POG1</i>   | YIL122W |
| <i>ATG7</i>  | YHR171W         | <i>ERV14</i> | YGL054C | <i>LRS4</i>   | YDR439W   | <i>POP2</i>   | YNR052C |
| <i>ATG8</i>  | YBL078C         | <i>ERV25</i> | YML012W | <i>MAD3</i>   | YJL013C   | <i>PPH3</i>   | YDR075W |
| <i>ATG9</i>  | YDL149W         | <i>FAB1</i>  | YFR019W | <i>MAF1</i>   | YDR005C   | <i>PRB1</i>   | YEL060C |
| <i>BAR1</i>  | YIL015W         | <i>FAR11</i> | YNL127W | <i>MAM1</i>   | YER106W   | <i>PRS3</i>   | YHL011C |
| <i>BLI1</i>  | YKL061W         | <i>FAT1</i>  | YBR041W | <i>MCK1</i>   | YNL307C   | <i>PTC1</i>   | YDL006W |
| <i>BPH1</i>  | YCR032W         | <i>FBP1</i>  | YLR377C | <i>MEI5</i>   | YPL121C   | <i>PTC5</i>   | YOR090C |
| <i>BSD2</i>  | YBR290W         | <i>FIS1</i>  | YIL065C | <i>MET1</i>   | YKR069W   | <i>RAD33</i>  | YML011C |
| <i>BST1</i>  | YFL025C         | <i>FMP46</i> | YKR049C | <i>MET13</i>  | YGL125W   | <i>RAD51</i>  | YER095W |
| <i>BTS1</i>  | YPL069C         | <i>FMS1</i>  | YMR020W | <i>MET22</i>  | YOL064C   | <i>RAD55</i>  | YDR076W |
| <i>BUD22</i> | YMR014W         | <i>FUN12</i> | YAL035W | <i>MLS1</i>   | YNL117W   | <i>RAD57</i>  | YDR004W |
| <i>CBC2</i>  | YPL178W         | <i>GAL11</i> | YOL051W | <i>MMS4</i>   | YBR098W   | <i>RAD6</i>   | YGL058W |

gene name systematic name

---

|               |           |              |         |                |           |
|---------------|-----------|--------------|---------|----------------|-----------|
| <i>RAI1</i>   | YGL246C   | <i>SHP1</i>  | YBL058W | <i>THR4</i>    | YCR053W   |
| <i>RAM1</i>   | YDL090C   | <i>SIN3</i>  | YOL004W | <i>TIF4631</i> | YGR162W   |
| <i>RCY1</i>   | YJL204C   | <i>SKN1</i>  | YGR143W | <i>TIR1</i>    | YER011W   |
| <i>RDH54</i>  | YBR073W   | <i>SLM3</i>  | YDL033C | <i>TMA64</i>   | YDR117C   |
| <i>REC8</i>   | YPR007C   | <i>SLX5</i>  | YDL013W | <i>TOM1</i>    | YDR457W   |
| <i>REF2</i>   | YDR195W   | <i>SLX8</i>  | YER116C | <i>TPS1</i>    | YBR126C   |
| <i>RIM101</i> | YHL027W   | <i>SLZ1</i>  | YNL196C | <i>TPS2</i>    | YDR074W   |
| <i>RIM11</i>  | YMR139W   | <i>SMA2</i>  | YML066C | <i>TRM9</i>    | YML014W   |
| <i>RIM15</i>  | YFL033C   | <i>SMK1</i>  | YPR054W | <i>TUL1</i>    | YKL034W   |
| <i>RIM4</i>   | YHL024W   | <i>SNF2</i>  | YOR290C | <i>TUP1</i>    | YCR084C   |
| <i>RMD1</i>   | YDL001W   | <i>SNF3</i>  | YDL194W | <i>UBP14</i>   | YBR058C   |
| <i>RMD5</i>   | YDR255C   | <i>SNF4</i>  | YGL115W | <i>UFD2</i>    | YDL190C   |
| <i>RMD6</i>   | YEL072W   | <i>SNF6</i>  | YHL025W | <i>UME1</i>    | YPL139C   |
| <i>RMD7</i>   | YER083C   | <i>SNF7</i>  | YLR025W | <i>VID28</i>   | YIL017C   |
| <i>RMD8</i>   | YFR048W   | <i>SPF1</i>  | YEL031W | <i>VMS1</i>    | YDR049W   |
| <i>RMD9</i>   | YGL107C   | <i>SPO1</i>  | YNL012W | <i>VPH1</i>    | YOR270C   |
| <i>RPA49</i>  | YNL248C   | <i>SPO16</i> | YHR153C | <i>VPS13</i>   | YLL040C   |
| <i>RPL14A</i> | YKL006W   | <i>SPO19</i> | YPL130W | <i>VPS20</i>   | YMR077C   |
| <i>RPL19A</i> | YBR084C-A | <i>SPO20</i> | YMR017W | <i>VPS24</i>   | YKL041W   |
| <i>RPL27A</i> | YHR010W   | <i>SPO71</i> | YDR104C | <i>VPS27</i>   | YNR006W   |
| <i>RPL2A</i>  | YFR031C-A | <i>SPO73</i> | YER046W | <i>VPS3</i>    | YDR495C   |
| <i>RPL2B</i>  | YIL018W   | <i>SPO75</i> | YLL005C | <i>VPS4</i>    | YPR173C   |
| <i>RPL31A</i> | YDL075W   | <i>SPO77</i> | YLR341W | <i>VPS52</i>   | YDR484W   |
| <i>RPL34B</i> | YIL052C   | <i>SPR3</i>  | YGR059W | <i>VPS53</i>   | YJL029C   |
| <i>RPL40A</i> | YIL148W   | <i>SPS1</i>  | YDR523C | <i>VPS54</i>   | YDR027C   |
| <i>RPL7A</i>  | YGL076C   | <i>SPT10</i> | YJL127C | <i>WHI3</i>    | YNL197C   |
| <i>RTC6</i>   | YPL183W-A | <i>SPT20</i> | YOL148C | <i>YAP1</i>    | YML007W   |
| <i>RTF1</i>   | YGL244W   | <i>SPT3</i>  | YDR392W | <i>YET3</i>    | YDL072C   |
| <i>SAC7</i>   | YDR389W   | <i>SPT4</i>  | YGR063C | <i>YPF1</i>    | YKL100C   |
| <i>SAE2</i>   | YGL175C   | <i>SRT1</i>  | YMR101C | <i>YSP2</i>    | YDR326C   |
| <i>SAE3</i>   | YHR079C-A | <i>SRV2</i>  | YNL138W | <i>YVH1</i>    | YIR026C   |
| <i>SAP190</i> | YKR028W   | <i>SSF1</i>  | YHR066W | <i>ZIP1</i>    | YDR285W   |
| <i>SCJ1</i>   | YMR214W   | <i>SSN8</i>  | YNL025C | <i>ZUO1</i>    | YGR285C   |
| <i>SCO1</i>   | YBR037C   | <i>SSO2</i>  | YMR183C |                | YBR090C   |
| <i>SCS2</i>   | YER120W   | <i>SSP2</i>  | YOR242C |                | YDL119C   |
| <i>SDH2</i>   | YLL041C   | <i>SSZ1</i>  | YHR064C |                | YEL020C   |
| <i>SDH5</i>   | YOL071W   | <i>STP4</i>  | YDL048C |                | YGR111W   |
| <i>SDH7</i>   | YDR511W   | <i>SWF1</i>  | YDR126W |                | YHR202W   |
| <i>SDS3</i>   | YIL084C   | <i>SWF5</i>  | YOR333C |                | YHR210C   |
| <i>SEC22</i>  | YLR268W   | <i>SWI3</i>  | YJL176C |                | YJL160C   |
| <i>SED4</i>   | YCR067C   | <i>SWM1</i>  | YDR260C |                | YJR079W   |
| <i>SFK1</i>   | YKL051W   | <i>SWS2</i>  | YNL081C |                | YNL146W   |
| <i>SGF29</i>  | YCL010C   | <i>TGL4</i>  | YKR089C |                | YOR008C-A |
| <i>SGF73</i>  | YGL066W   | <i>TGS1</i>  | YPL157W |                |           |
| <i>SHE9</i>   | YDR393W   | <i>THP2</i>  | YHR167W |                |           |

---
