# Supplementary material for: The Dysferlin Domain-Only Protein, Spo73, Is Required for Prospore Membrane Extension in Saccharomyces cerevisiae
Source: PubMed Central journal article supplement (PMC4863634; doi:10.1128/msphere.00038-15), 2015-12-16
Supplement: sph001160039st2.pdf [file sph001160039st2.pdf]

Table S2. Construction of strains

Yesat Strains

| Locus                      | Construction                                                                         |
|----------------------------|--------------------------------------------------------------------------------------|
| <i>spo71Δ::kanMX6</i>      | HT403 and HT404, pFA6a-kanMX6 (1)                                                    |
| <i>spo73Δ::kanMX6</i>      | IC7 and IC8, pFA6a-kanMX6 (1)                                                        |
| <i>ura3::URA3-DON1-GFP</i> | 306-DON1-GFP                                                                         |
| <i>spo1Δ::kanMX6</i>       | HT372 and HT373, genomic DNA of <i>spo1Δ::kanMX6</i> strain from deletion collection |
| <i>spo1Δ::HIS3MX6</i>      | pFA6a-His3MX6 (1) ( <i>spo1Δ::kanMX6</i> to <i>spo1Δ::HIS3MX6</i> )                  |
| <i>spo73Δ::HIS3MX6</i>     | pFA6a-His3MX6(1) ( <i>spo73Δ::kanMX6</i> to <i>spo73Δ::HIS3MX6</i> )                 |
| <i>ssp1Δ::kanMX6</i>       | HT86 and HT87, pFA6a-kanMX6 (1)                                                      |
| <i>VPS13::GFP-HIS3MX6</i>  | IC4 and IC5, pFA6a-yEGFP-HIS3MX6 (2)                                                 |
| <i>HIS3</i>                | TN377 and TN378, pRS303 (3) ( <i>his3ΔSK</i> to <i>HIS3</i> )                        |

1. **Longtine MS, Iii AMK, Demarini DJ, Shah NG.** 1998. Additional Modules for Versatile and Economical PCR-based Gene Deletion and Modification in *Saccharomyces cerevisiae*. *Yeast* **961**:953–961.
2. **Nickas ME, Neiman AM.** 2002. Ady3p Links Spindle Pole Body Function to Spore Wall Synthesis in *Saccharomyces cerevisiae*. *Genetics* **1450**:1439–1450.
3. **Sikorski RS, Hieter P.** 1989. A System of Shuttle Vectors and Yeast Host Strains Designed for Efficient Manipulation of DNA in. *Genetics* **122**:19–27.
