# Supplementary material for: The Dysferlin Domain-Only Protein, Spo73, Is Required for Prospore Membrane Extension in Saccharomyces cerevisiae
Source: PubMed Central journal article supplement (PMC4863634; doi:10.1128/msphere.00038-15), 2015-12-16
Supplement: sph001160039st3.pdf [file sph001160039st3.pdf]

Table S3. Primers used in this study

| Name  | Sequence (5'→3')                                                           |
|-------|----------------------------------------------------------------------------|
| HT403 | TTCGAAGGATCTCTTTTCTTC                                                      |
| HT404 | TGAGGAGGAAGGTACTAATG                                                       |
| IC7   | GAATCTTGTCTACGTAATTG                                                       |
| IC8   | TGTTCTGCATAATGTCACCT                                                       |
| HT372 | AAAACATACTTCAGCGGCTA                                                       |
| HT373 | ATGGCAAGATTTTATTACTG                                                       |
| HT86  | ACAATAGTGCCTATTATCATGATAGAAGTAGAGTAGAAAA<br>GCTAGCAACACGGATCCCCGGGTAAATTA  |
| HT87  | CAATAAGCATAGAACATGGAATGAGTGTTCAAATATATT<br>CGTTTGTGTTTGAATTCGAGCTCGTTTAAAC |
| IC4   | ACATCGCCATTGCTGTTAGAGAATACAATAAGTACTGTGAA<br>GCTATCCTACGGATCCCCGGGTAAATTA  |
| IC5   | TAATACGATTGAATTATAGCTACATAGTGTACAAAAGCGGG<br>TATATACTTGAATTCGAGCTCGTTTAAAC |
| OK13  | AAACCTTATTATATGCCTTTACATATACTGTCACGCGACATT<br>TTCACCTTGAATTCGAGCTCGTTTAAAC |
| OK14  | ACGTCCTCCGGTAAAGCAGAGAAATCCTTCAAGAAATGGTT<br>TTTGCCCATTTTGTATAGTTCATCCATGC |
| HT369 | GAGAAGGTACCTAAGTCTAGGCGCTTTCAA                                             |
| OK15  | GAAGAATTCCACTACGAGATCTGGGTGAT                                              |
| OK29  | TGGAATTTCAATAACTCTGCTTGGGCTAGCGCTAATGGCTTG GTGAG                           |
| OK30  | CTCACCAAGCCATTAGCGCTAGCCCAAGCAGAGTTATTGAAATTCCA                            |
| HT421 | GAAGAAGGTACCCTTGCTTCGATTTTCGGTAGT                                          |
| HT422 | GAAGAATTAATTAAGACATATATCTCTATGTATGAT                                       |
| OK11  | GAAGAACCGCGGAAATGATGATGAAAGGACTG                                           |
| HT424 | GAAGAATTCGGGTGAACATAGCAATATAG                                              |
| TN194 | GAAGAAGAAGCGGCCGCAACATCCAAAAGGAATCTACTC                                    |
| TN197 | GAAGAAGGTACCACTTGGCTCGTCTGGATTCC                                           |
| TN62  | GAAGAACTCGAGATTATATATTAATTTGCTC                                            |
| HT66E | GAAGAATTCAGATCTATATTACCCTGTTATCC                                           |
| TN377 | CGTTTTAAGAGCTTGGTGAG                                                       |
| TN378 | TCGAGTTCAAGAGAAAAAAAAG                                                     |
