# Supplementary material for: The Dysferlin Domain-Only Protein, Spo73, Is Required for Prospore Membrane Extension in Saccharomyces cerevisiae
Source: PubMed Central journal article supplement (PMC4863634; doi:10.1128/msphere.00038-15), 2015-12-16
Supplement: sph001160039st4.pdf [file sph001160039st4.pdf]

Table S4. Plasmids used in this study

| Name                                             | Protein expressed                      | Source     |
|--------------------------------------------------|----------------------------------------|------------|
| pRS424-G20                                       | GFP- Spo20 <sup>51-91</sup>            | (1)        |
| pRS426-R20                                       | mRFP-Spo20 <sup>51-91</sup>            | (2)        |
| 306-DON1-GFP                                     | Don1-GFP                               | This study |
| 316-HTB2-mCherry                                 | Htb2-mCherry                           | This study |
| pRS424- <i>DTR1-RFP</i>                          | Dtr1-mRFP                              | (3)        |
| pRS426-P <sub>PRC1</sub> -GFP-PH <sup>OSH2</sup> | GFP-PH <sup>OSH2</sup>                 | (4)        |
| 424- P <sub>SPO20</sub> -GFP-SPO73               | GFP-Spo73                              | This study |
| 424- P <sub>SPO20</sub> -GFP-SPO73-AAA           | GFP-Spo73 <sup>R119A K121A K123A</sup> | This study |
| 314- P <sub>SPO73</sub> -GFP-SPO73               | GFP-Spo73                              | This study |
| 314- P <sub>SPO73</sub> -GFP-SPO73-AAA           | GFP-Spo73 <sup>R119A K121A K123A</sup> | This study |
| 424-SPO71-GFP                                    | Spo71-GFP                              | (5)        |
| 426-SPO71                                        | Spo71                                  | This study |
| 426-VPS13                                        | Vps13                                  | This study |

1. **Nakanishi H, de los Santos P, M. NA.** 2004. Positive and Negative Regulation of a SNARE Protein by Control of Intracellular Localization. *Mol Biol Cell* **15**:1802–1815.
2. **Suda Y, Nakanishi H, Mathieson EM, Neiman AM.** 2007. Alternative modes of organellar segregation during sporulation in *Saccharomyces cerevisiae*. *Eukaryot Cell* **6**:2009–17.
3. **Park J-S, Neiman AM.** 2012. *VPS13* regulates membrane morphogenesis during sporulation in *Saccharomyces cerevisiae*. *J Cell Sci* **125**:3004–3011.
4. **Yu JW, Mendrola JM, Audhya A, Singh S, Keleti D, DeWald DB, Murray D, Emr SD, Lemmon M a.** 2004. Genome-wide analysis of membrane targeting by *S. cerevisiae* pleckstrin homology domains. *Mol Cell* **13**:677–688.
5. **Park JS, Okumura Y, Tachikawa H, Neiman AM.** 2013. *SPO71* encodes a developmental stage-specific partner for Vps13 in *Saccharomyces cerevisiae*. *Eukaryot Cell* **12**:1530–1537.
